# Supplementary material for: Influence of Overnight Orthokeratology Lens Treatment Zone Decentration on Myopia Progression
Source: J Ophthalmol. 2019 Nov 15;2019:2596953. doi: 10.1155/2019/2596953 (PMC6881772; doi:10.1155/2019/2596953)
Supplement: Supplementary Materials — The excel sheet can be described as “ocular biometric parameters of 30 children included in this study before orthokeratology and the growth of AL one year after. [file 2596953.f1.xlsx]

## Sheet: 单眼偏位组
The eyes	which were deviated are marked	with pink background
NO.1	Gender	Female	Age	9	phone：		Files Number	1285
OD	spherical refractive error (DS)	Regular astigmatism (DC)	HK	VK	equivalent E Value	lucid	temporal decentration 0.5mm	lens diameter	AL of baseline	AL growth per year	0.27
	-3	0	42.75	43.75	0.61			10.6	24.65
OS	spherical refractive error (DS)	Regular astigmatism (DC)	HK	VK	equivalent E Value	lucid	central location	lens diameter	AL of baseline	AL growth per year	0.42
	-1.25	0	42.3	43.82	0.67			10.6	23.77
NO.2	Gender	Female	Age	8	phone：		Files Number	1387
OD	spherical refractive error (DS)	Regular astigmatism (DC)	HK	VK	equivalent E Value	lucid	temporal decentration 0.5mm	lens diameter	AL of baseline	AL growth per year	0.5
	-0.75	-0.75	41.25	42.25	0.73			10.6	24.66
OS	spherical refractive error (DS)	Regular astigmatism (DC)	HK	VK	equivalent E Value	lucid	central location	lens diameter	AL of baseline	AL growth per year	0.61
	-0.75	-0.75	41	42.25	0.74			10.6	24.82
NO.3	Gender	Male	Age	9	phone：		Files Number	1399
OD	spherical refractive error (DS)	Regular astigmatism (DC)	HK	VK	equivalent E Value	lucid	nasal decentration 0.75mm	lens diameter	AL of baseline	AL growth per year	0.29
	-4	-0.5	42	43	0.68			10.4	25.48
OS	spherical refractive error (DS)	Regular astigmatism (DC)	HK	VK	equivalent E Value	lucid	central location	lens diameter	AL of baseline	AL growth per year	0.47
	-3.25	-0.5	42.5	43	0.68			10.6	25.31
NO.4	Gender	Male	Age	12	phone：		Files Number	1431
OD	spherical refractive error (DS)	Regular astigmatism (DC)	HK	VK	equivalent E Value	lucid	temporal decentration 0.5mm	lens diameter	AL of baseline	AL growth per year	0.19
	-3.5	0	43.75	44.5	0.54			10.6	25.76
OS	spherical refractive error (DS)	Regular astigmatism (DC)	HK	VK	equivalent E Value	lucid	central location	lens diameter	AL of baseline	AL growth per year	0.48
	-3.25	-0.5	43.5	45	0.51			10.6	25.4
NO.5	Gender	Male	Age	13	phone：		Files Number	1440
OD	spherical refractive error (DS)	Regular astigmatism (DC)	HK	VK	equivalent E Value	lucid	inferior decentration 0.5mm	lens diameter	AL of baseline	AL growth per year	0.15
	-3.75	-0.75	44.25	45	0.53			11	25.4
OS	spherical refractive error (DS)	Regular astigmatism (DC)	HK	VK	equivalent E Value	lucid	central location	lens diameter	AL of baseline	AL growth per year	0.16
	-3.25	-1.5	46	46.25	0.53			11	25.58
NO.6	Gender	Female	Age	8	phone：		Files Number	1449
OD	spherical refractive error (DS)	Regular astigmatism (DC)	HK	VK	equivalent E Value	lucid	central location	lens diameter	AL of baseline	AL growth per year	0.38
	-1	-0.5	42.25	42.25	0.59			10.6	23.74
OS	spherical refractive error (DS)	Regular astigmatism (DC)	HK	VK	equivalent E Value	lucid	temporal decentration 0.5mm	lens diameter	AL of baseline	AL growth per year	0.13
	-1.75	-0.25	43	43.5	0.57			10.6	23.97
NO.7	Gender	Female	Age	8	phone：		Files Number	1462
OD	spherical refractive error (DS)	Regular astigmatism (DC)	HK	VK	Eequivalent E Value	lucid	temporal decentration 0.5mm	lens diameter	AL of baseline	AL growth per year	0.26
	-2	0	41.25	42.25	0.62			10.6	24.95
OS	spherical refractive error (DS)	Regular astigmatism (DC)	HK	VK	equivalent E Value	lucid	central location	lens diameter	AL of baseline	AL growth per year	0.33
	-2	0	41.5	42.25	0.63			10.6	24.87
NO.8	Gender	Female	Age	8	phone：		Files Number	1561
OD	spherical refractive error (DS)	Regular astigmatism (DC)	HK	VK	equivalent E Value	lucid	central location	lens diameter	AL of baseline	AL growth per year	0.19
	-1	0	42	43	0.63			10.6	23.94
OS	spherical refractive error (DS)	Regular astigmatism (DC)	HK	VK	equivalent E Value	lucid	temporal decentration 0.5mm	lens diameter	AL of baseline	AL growth per year	0.17
	-1	0	41.5	42.5	0.64			10.6	24.08
NO.9	Gender	Male	Age	8	phone：		Files Number	1567
OD	spherical refractive error (DS)	Regular astigmatism (DC)	HK	VK	equivalent E Value	lucid	superior decentration 1mm	lens diameter	AL of baseline	AL growth per year	0.52
	-1.25	0	44.25	45	0.58			10.6	23.94
OS	spherical refractive error (DS)	Regular astigmatism (DC)	HK	VK	equivalent E Value	lucid	central location	lens diameter	AL of baseline	AL growth per year	0.71
	-1.25	-0.5	44.5	45	0.63			10.6	23.8
NO.10	Gender	Female	Age	11	phone：		Files Number	1595
OD	spherical refractive error (DS)	Regular astigmatism (DC)	HK	VK	equivalent E Value	lucid	inferior decentration 1.0mm	lens diameter	AL of baseline	AL growth per year	-0.06
	-2.75	-1	44.13	44.59	0.69			10.2	24.7
OS	spherical refractive error (DS)	Regular astigmatism (DC)	HK	VK	equivalent E Value	lucid	central location	lens diameter	AL of baseline	AL growth per year	0.21
	-2	-0.5	46.09	46.26	0.68			10.2	24.18
NO.11	Gender	Female	Age	8	phone：		Files Number	1695
OD	spherical refractive error (DS)	Regular astigmatism (DC)	HK	VK	equivalent E Value	lucid	central location	lens diameter	AL of baseline	AL growth per year	0.38
	-1.75	0	41	41.25	0.85			10.6	24.98
OS	spherical refractive error (DS)	Regular astigmatism (DC)	HK	VK	equivalent E Value	lucid	inferior decentration 1.0mm	lens diameter	AL of baseline	AL growth per year	0.48
	-2.25	0	41.5	41.75	0.64			10.6	24.9
NO.12	Gender	Male	Age	9	phone：		Files Number	1705
OD	spherical refractive error (DS)	Regular astigmatism (DC)	HK	VK	equivalent E Value	lucid	central location	lens diameter	AL of baseline	AL growth per year	0.08
	-1.25	0	39.5	39.25	0.76			10.8	25.59
OS	spherical refractive error (DS)	Regular astigmatism (DC)	HK	VK	equivalent E Value	lucid	temporal decentration 0.75mm	lens diameter	AL of baseline	AL growth per year	-0.06
	-1.25	0	40	39.75	0.77			10.8	25.56
NO.13	Gender	Male	Age	10	phone：		Files Number	1724
OD	spherical refractive error (DS)	Regular astigmatism (DC)	HK	VK	equivalent E Value	lucid	central location	lens diameter	AL of baseline	AL growth per year	0.12
	-4.25	-1.25	42.5	44.25	0.62			10.6	25.73
OS	spherical refractive error (DS)	Regular astigmatism (DC)	HK	VK	equivalent E Value	lucid	temporal decentration 1.0mm	lens diameter	AL of baseline	AL growth per year	0.01
	-3.75	-1.75	42	44.25	0.64			10.6	25.66
NO.14	Gender	Female	Age	8	phone：		Files Number	1801
OD	spherical refractive error (DS)	Regular astigmatism (DC)	HK	VK	equivalent E Value	Alpha toric cp-1.5	central location	lens diameter	AL of baseline	AL growth per year	0.57
	-4.75	-0.75	41.25	42	0.53			11	26.03
OS	spherical refractive error (DS)	Regular astigmatism (DC)	HK	VK	equivalent E Value	lucid toric cp-1	nasal decentration 0.75mm	lens diameter	AL of baseline	AL growth per year	0.96
	-4.75	0	41.25	41.75	0.6			11	25.76
NO.15	Gender	Male	Age	8	phone：		Files Number	1804
OD	spherical refractive error (DS)	Regular astigmatism (DC)	HK	VK	equivalent E Value	lucid	central location	lens diameter	AL of baseline	AL growth per year	-0.19
	-2	0	42.75	43	0.42			10.8	25.01
OS	spherical refractive error (DS)	Regular astigmatism (DC)	HK	VK	equivalent E Value	lucid	nasal decentration 1.0mm	lens diameter	AL of baseline	AL growth per year	-0.18
	-2	0	44	43.75	0.42			10.6	25.02
NO.16	Gender	Male	Age	8	phone：		Files Number	1826
OD	spherical refractive error (DS)	Regular astigmatism (DC)	HK	VK	equivalent E Value	lucid	central location	lens diameter	AL of baseline	AL growth per year	0.34
	-1.25	-0.75	44.25	45.75	0.61			10.6	22.7
OS	spherical refractive error (DS)	Regular astigmatism (DC)	HK	VK	equivalent E Value	lucid	temporal decentration 1.5mm	lens diameter	AL of baseline	AL growth per year	0.2
	-1.5	-0.75	44	45	0.6			10.6	23.17
NO.17	Gender	Female	Age	8	phone：		Files Number	1882
OD	spherical refractive error (DS)	Regular astigmatism (DC)	HK	VK	equivalent E Value	Alpha	central location	lens diameter	AL of baseline	AL growth per year	0.2
	-2.25	-0.75	45	47	0.58			10.6	23.6
OS	spherical refractive error (DS)	Regular astigmatism (DC)	HK	VK	equivalent E Value	Alpha	temporal decentration 0.5mm	lens diameter	AL of baseline	AL growth per year	-0.15
	-1.75	-0.75	45.5	46	0.54			10.6	23.57
NO.18	Gender	Female	Age	10	phone：		Files Number	1894
OD	spherical refractive error (DS)	Regular astigmatism (DC)	HK	VK	equivalent E Value	lucid	central location	lens diameter	AL of baseline	AL growth per year	0.48
	-2.5	0	45	46	0.56			10.6	23.93
OS	spherical refractive error (DS)	Regular astigmatism (DC)	HK	VK	equivalent E Value	lucid	temporal decentration 1.0mm	lens diameter	AL of baseline	AL growth per year	0.51
	-2	0	44.75	45.5	0.57			10.6	23.83
NO.19	Gender	Female	Age	9	phone：		Files Number	1921
OD	spherical refractive error (DS)	Regular astigmatism (DC)	HK	VK	equivalent E Value	Alpha	central location	lens diameter	AL of baseline	AL growth per year	-0.02
	-4.25	0	43.5	44	0.68			10.6	24.61
OS	spherical refractive error (DS)	Regular astigmatism (DC)	HK	VK	equivalent E Value	Alpha	superior decentration 0.5mm	lens diameter	AL of baseline	AL growth per year	-0.08
	-3.5	-0.75	43	43.75	0.66			10.6	24.74
NO.20	Gender	Male	Age	8	phone：		Files Number	1936
OD	spherical refractive error (DS)	Regular astigmatism (DC)	HK	VK	equivalent E Value	lucid toric cp-1.0	central location	lens diameter	AL of baseline	AL growth per year	0.21
	-3	-1.5	41.5	43.75	0.72			10.6	25.46
OS	spherical refractive error (DS)	Regular astigmatism (DC)	HK	VK	equivalent E Value	lucid toric cp-1.0	temporal decentration 1.0mm	lens diameter	AL of baseline	AL growth per year	0.35
	-3	-1.5	41.25	43.5	0.63			10.8	25.52
NO.21	Gender	Male	Age	10	phone：		Files Number	1962
OD	spherical refractive error (DS)	Regular astigmatism (DC)	HK	VK	equivalent E Value	lucid toric cp-1.0	central location	lens diameter	AL of baseline	AL growth per year	0.3
	-2.25	-0.75	42.25	43	0.63			10.6	25.49
OS	spherical refractive error (DS)	Regular astigmatism (DC)	HK	VK	equivalent E Value	lucid toric cp-1.0	temporal decentration 1.0mm	lens diameter	AL of baseline	AL growth per year	0.04
	-2.25	-0.75	42.25	43.25	0.62			10.6	25.37
NO.22	Gender	Male	Age	10	phone：		Files Number	1980
OD	spherical refractive error (DS)	Regular astigmatism (DC)	HK	VK	equivalent E Value	lucid	nasal decentration 0.75mm	lens diameter	AL of baseline	AL growth per year	0.2
	-3.5	-1.25	43	44.5	0.72			10.6	25.43
OS	spherical refractive error (DS)	Regular astigmatism (DC)	HK	VK	equivalent E Value	lucid	central location	lens diameter	AL of baseline	AL growth per year	0.24
	-3	-0.75	43.25	44	0.65			10.6	25.25
NO.23	Gender	Male	Age	8	phone：		Files Number	2049
OD	spherical refractive error (DS)	Regular astigmatism (DC)	HK	VK	equivalent E Value	lucid	central location	lens diameter	AL of baseline	AL growth per year	0.42
	-1.75	0	44	45	0.52			10.6	23.7
OS	spherical refractive error (DS)	Regular astigmatism (DC)	HK	VK	equivalent E Value	lucid	temporal decentration 0.75mm	lens diameter	AL of baseline	AL growth per year	0.46
	-1.5	0	43.75	45	0.48			10.6	23.78
NO.24	Gender	Male	Age	8	phone：		Files Number	2089
OD	spherical refractive error (DS)	Regular astigmatism (DC)	HK	VK	equivalent E Value	lucid	temporal decentration 0.5mm	lens diameter	AL of baseline	AL growth per year	0.1
	-2	0	40.75	41.25	0.67			10.6	25.41
OS	spherical refractive error (DS)	Regular astigmatism (DC)	HK	VK	equivalent E Value	lucid	central location	lens diameter	AL of baseline	AL growth per year	0.06
	-2.25	-0.75	40.75	41.5	0.65			10.6	25.21
NO.25	Gender	Male	Age	9	phone：		Files Number	2091
OD	spherical refractive error (DS)	Regular astigmatism (DC)	HK	VK	equivalent E Value	lucid	central location	lens diameter	AL of baseline	AL growth per year	0.34
	-2.5	0	43	44	0.55			10.6	23.93
OS	spherical refractive error (DS)	Regular astigmatism (DC)	HK	VK	equivalent E Value	lucid	temporal decentration 0.5mm	lens diameter	AL of baseline	AL growth per year	0.05
	-2.75	0	43	43.5	0.57			10.6	24.05
NO.26	Gender	Female	Age	11	phone：		Files Number	2127
OD	spherical refractive error (DS)	Regular astigmatism (DC)	HK	VK	equivalent E Value	lucid	central location	lens diameter	AL of baseline	AL growth per year	0.27
	-0.75	-0.75	44	45.25	0.62			10.2	23.51
OS	spherical refractive error (DS)	Regular astigmatism (DC)	HK	VK	equivalent E Value	lucid	temporal decentration 0.5mm	lens diameter	AL of baseline	AL growth per year	0.18
	-0.75	-0.75	44	45.25	0.62			10	23.48
NO.27	Gender	Female	Age	10	phone：		Files Number	2198
OD	spherical refractive error (DS)	Regular astigmatism (DC)	HK	VK	equivalent E Value	lucid toric cp-1	superior decentration 0.75mm	lens diameter	AL of baseline	AL growth per year	0.07
	-3.5	-0.5	42.5	43	0.7			10.4	25.01
OS	spherical refractive error (DS)	Regular astigmatism (DC)	HK	VK	equivalent E Value	lucid	central location	lens diameter	AL of baseline	AL growth per year	0.45
	-3.5	-0.75	42.75	43.5	0.75			10.6	24.9
NO.28	Gender	Male	Age	9	phone：		Files Number	2329
OD	spherical refractive error (DS)	Regular astigmatism (DC)	HK	VK	equivalent E Value	lucid	central location	lens diameter	AL of baseline	AL growth per year	0.36
	-2	0	43.5	44	0.48			10.6	24.38
OS	spherical refractive error (DS)	Regular astigmatism (DC)	HK	VK	equivalent E Value	lucid	temporal decentration 0.5mm	lens diameter	AL of baseline	AL growth per year	0.33
	-1.25	0	44	44.5	0.49			10.6	23.85
NO.29	Gender	Female	Age	12	phone：		Files Number	2352
OD	spherical refractive error (DS)	Regular astigmatism (DC)	HK	VK	equivalent E Value	lucid	temporal decentration 0.75mm	lens diameter	AL of baseline	AL growth per year	0.08
	-2.25	0	42.25	42.5	0.57			10.6	24.98
OS	spherical refractive error (DS)	Regular astigmatism (DC)	HK	VK	equivalent E Value	Alpha	central location	lens diameter	AL of baseline	AL growth per year	0.06
	-2.25	0	42.5	43.25	0.78			10.6	24.69
NO.30	Gender	Female	Age	12	phone：		Files Number	2472
OD	spherical refractive error (DS)	Regular astigmatism (DC)	HK	VK	equivalent E Value	lucid toric cp-1	temporal decentration 0.75mm	lens diameter	AL of baseline	AL growth per year	0
	-2.5	-1.5	42.5	44.25	0.67			10.6	25.2
OS	spherical refractive error (DS)	Regular astigmatism (DC)	HK	VK	equivalent E Value	Alpha	central location	lens diameter	AL of baseline	AL growth per year	0.17
	-3	-1.5	42.5	44	0.66			10.6	25.37

## Sheet: 备选
1426
1989
2050
2180

## Sheet: 对照组
姓名	俞嘉琪	性别	女	年龄	9y	电话	18964303980	病历号	1385	品牌	lucid
右眼	矫正视力	球镜	柱镜	HK	VK	E值	单双眼戴镜	初始眼轴	片径												每3月增长眼轴
	1	-3	0	43.75	42.75	0.61	单	24.43	10.6	眼轴
左眼	矫正视力	球镜	柱镜	HK	VK	E值		初始眼轴	片径												每3月增长眼轴
姓名		性别		年龄		电话		病历号		品牌
右眼	矫正视力	球镜	柱镜	HK	VK	E值		初始眼轴	片径												每3月增长眼轴
										眼轴
左眼	矫正视力	球镜	柱镜	HK	VK	E值		初始眼轴	片径												每3月增长眼轴
姓名		性别		年龄		电话		病历号		品牌
右眼	矫正视力	球镜	柱镜	HK	VK	E值		初始眼轴	片径												每3月增长眼轴
										眼轴
左眼	矫正视力	球镜	柱镜	HK	VK	E值		初始眼轴	片径												每3月增长眼轴
姓名		性别		年龄		电话		病历号		品牌
右眼	矫正视力	球镜	柱镜	HK	VK	E值		初始眼轴	片径												每3月增长眼轴
										眼轴
左眼	矫正视力	球镜	柱镜	HK	VK	E值		初始眼轴	片径												每3月增长眼轴
姓名		性别		年龄		电话		病历号		品牌
右眼	矫正视力	球镜	柱镜	HK	VK	E值		初始眼轴	片径												每3月增长眼轴
										眼轴
左眼	矫正视力	球镜	柱镜	HK	VK	E值		初始眼轴	片径												每3月增长眼轴
姓名		性别		年龄		电话		病历号		品牌
右眼	矫正视力	球镜	柱镜	HK	VK	E值		初始眼轴	片径												每3月增长眼轴
										眼轴
左眼	矫正视力	球镜	柱镜	HK	VK	E值		初始眼轴	片径												每3月增长眼轴
姓名		性别		年龄		电话		病历号		品牌
右眼	矫正视力	球镜	柱镜	HK	VK	E值		初始眼轴	片径												每3月增长眼轴
										眼轴
左眼	矫正视力	球镜	柱镜	HK	VK	E值		初始眼轴	片径												每3月增长眼轴
姓名		性别		年龄		电话		病历号		品牌
右眼	矫正视力	球镜	柱镜	HK	VK	E值		初始眼轴	片径												每3月增长眼轴
										眼轴
左眼	矫正视力	球镜	柱镜	HK	VK	E值		初始眼轴	片径												每3月增长眼轴
姓名		性别		年龄		电话		病历号		品牌
右眼	矫正视力	球镜	柱镜	HK	VK	E值		初始眼轴	片径												每3月增长眼轴
										眼轴
左眼	矫正视力	球镜	柱镜	HK	VK	E值		初始眼轴	片径												每3月增长眼轴
姓名		性别		年龄		电话		病历号		品牌
右眼	矫正视力	球镜	柱镜	HK	VK	E值		初始眼轴	片径												每3月增长眼轴
										眼轴
左眼	矫正视力	球镜	柱镜	HK	VK	E值		初始眼轴	片径												每3月增长眼轴
姓名		性别		年龄		电话		病历号		品牌
右眼	矫正视力	球镜	柱镜	HK	VK	E值		初始眼轴	片径												每3月增长眼轴
										眼轴
左眼	矫正视力	球镜	柱镜	HK	VK	E值		初始眼轴	片径												每3月增长眼轴
姓名		性别		年龄		电话		病历号		品牌
右眼	矫正视力	球镜	柱镜	HK	VK	E值		初始眼轴	片径												每3月增长眼轴
										眼轴
左眼	矫正视力	球镜	柱镜	HK	VK	E值		初始眼轴	片径												每3月增长眼轴
姓名		性别		年龄		电话		病历号		品牌
右眼	矫正视力	球镜	柱镜	HK	VK	E值		初始眼轴	片径												每3月增长眼轴
										眼轴
左眼	矫正视力	球镜	柱镜	HK	VK	E值		初始眼轴	片径												每3月增长眼轴
姓名		性别		年龄		电话		病历号		品牌
右眼	矫正视力	球镜	柱镜	HK	VK	E值		初始眼轴	片径												每3月增长眼轴
										眼轴
左眼	矫正视力	球镜	柱镜	HK	VK	E值		初始眼轴	片径												每3月增长眼轴
姓名		性别		年龄		电话		病历号		品牌
右眼	矫正视力	球镜	柱镜	HK	VK	E值		初始眼轴	片径												每3月增长眼轴
										眼轴
左眼	矫正视力	球镜	柱镜	HK	VK	E值		初始眼轴	片径												每3月增长眼轴
姓名		性别		年龄		电话		病历号		品牌
右眼	矫正视力	球镜	柱镜	HK	VK	E值		初始眼轴	片径												每3月增长眼轴
										眼轴
左眼	矫正视力	球镜	柱镜	HK	VK	E值		初始眼轴	片径												每3月增长眼轴
姓名		性别		年龄		电话		病历号		品牌
右眼	矫正视力	球镜	柱镜	HK	VK	E值		初始眼轴	片径												每3月增长眼轴
										眼轴
左眼	矫正视力	球镜	柱镜	HK	VK	E值		初始眼轴	片径												每3月增长眼轴
姓名		性别		年龄		电话		病历号		品牌
右眼	矫正视力	球镜	柱镜	HK	VK	E值		初始眼轴	片径												每3月增长眼轴
										眼轴
左眼	矫正视力	球镜	柱镜	HK	VK	E值		初始眼轴	片径												每3月增长眼轴
姓名		性别		年龄		电话		病历号		品牌
右眼	矫正视力	球镜	柱镜	HK	VK	E值		初始眼轴	片径												每3月增长眼轴
										眼轴
左眼	矫正视力	球镜	柱镜	HK	VK	E值		初始眼轴	片径												每3月增长眼轴
姓名		性别		年龄		电话		病历号		品牌
右眼	矫正视力	球镜	柱镜	HK	VK	E值		初始眼轴	片径												每3月增长眼轴
										眼轴
左眼	矫正视力	球镜	柱镜	HK	VK	E值		初始眼轴	片径												每3月增长眼轴
